# Supplementary material for: Feedback repression of PPARα signaling by Let-7 microRNA
Source: PubMed Central journal article supplement — Cell Rep. Author manuscript; Available in PMC 2021 Sep 8. (PMC8424520; doi:10.1016/j.celrep.2021.109506), 2021-08-10
Supplement: NIHMS1732330-supplement-1.pdf [file NIHMS1732330-supplement-1.pdf]

Cell Reports, Volume 36

**Supplemental information**

**Feedback repression of PPAR $\alpha$  signaling**

**by *Let-7* microRNA**

**Tomoki Yagai, Tingting Yan, Yuhong Luo, Shogo Takahashi, Daisuke Aibara, Donghwan Kim, Chad N. Brocker, Moshe Levi, Hozumi Motohashi, and Frank J. Gonzalez**

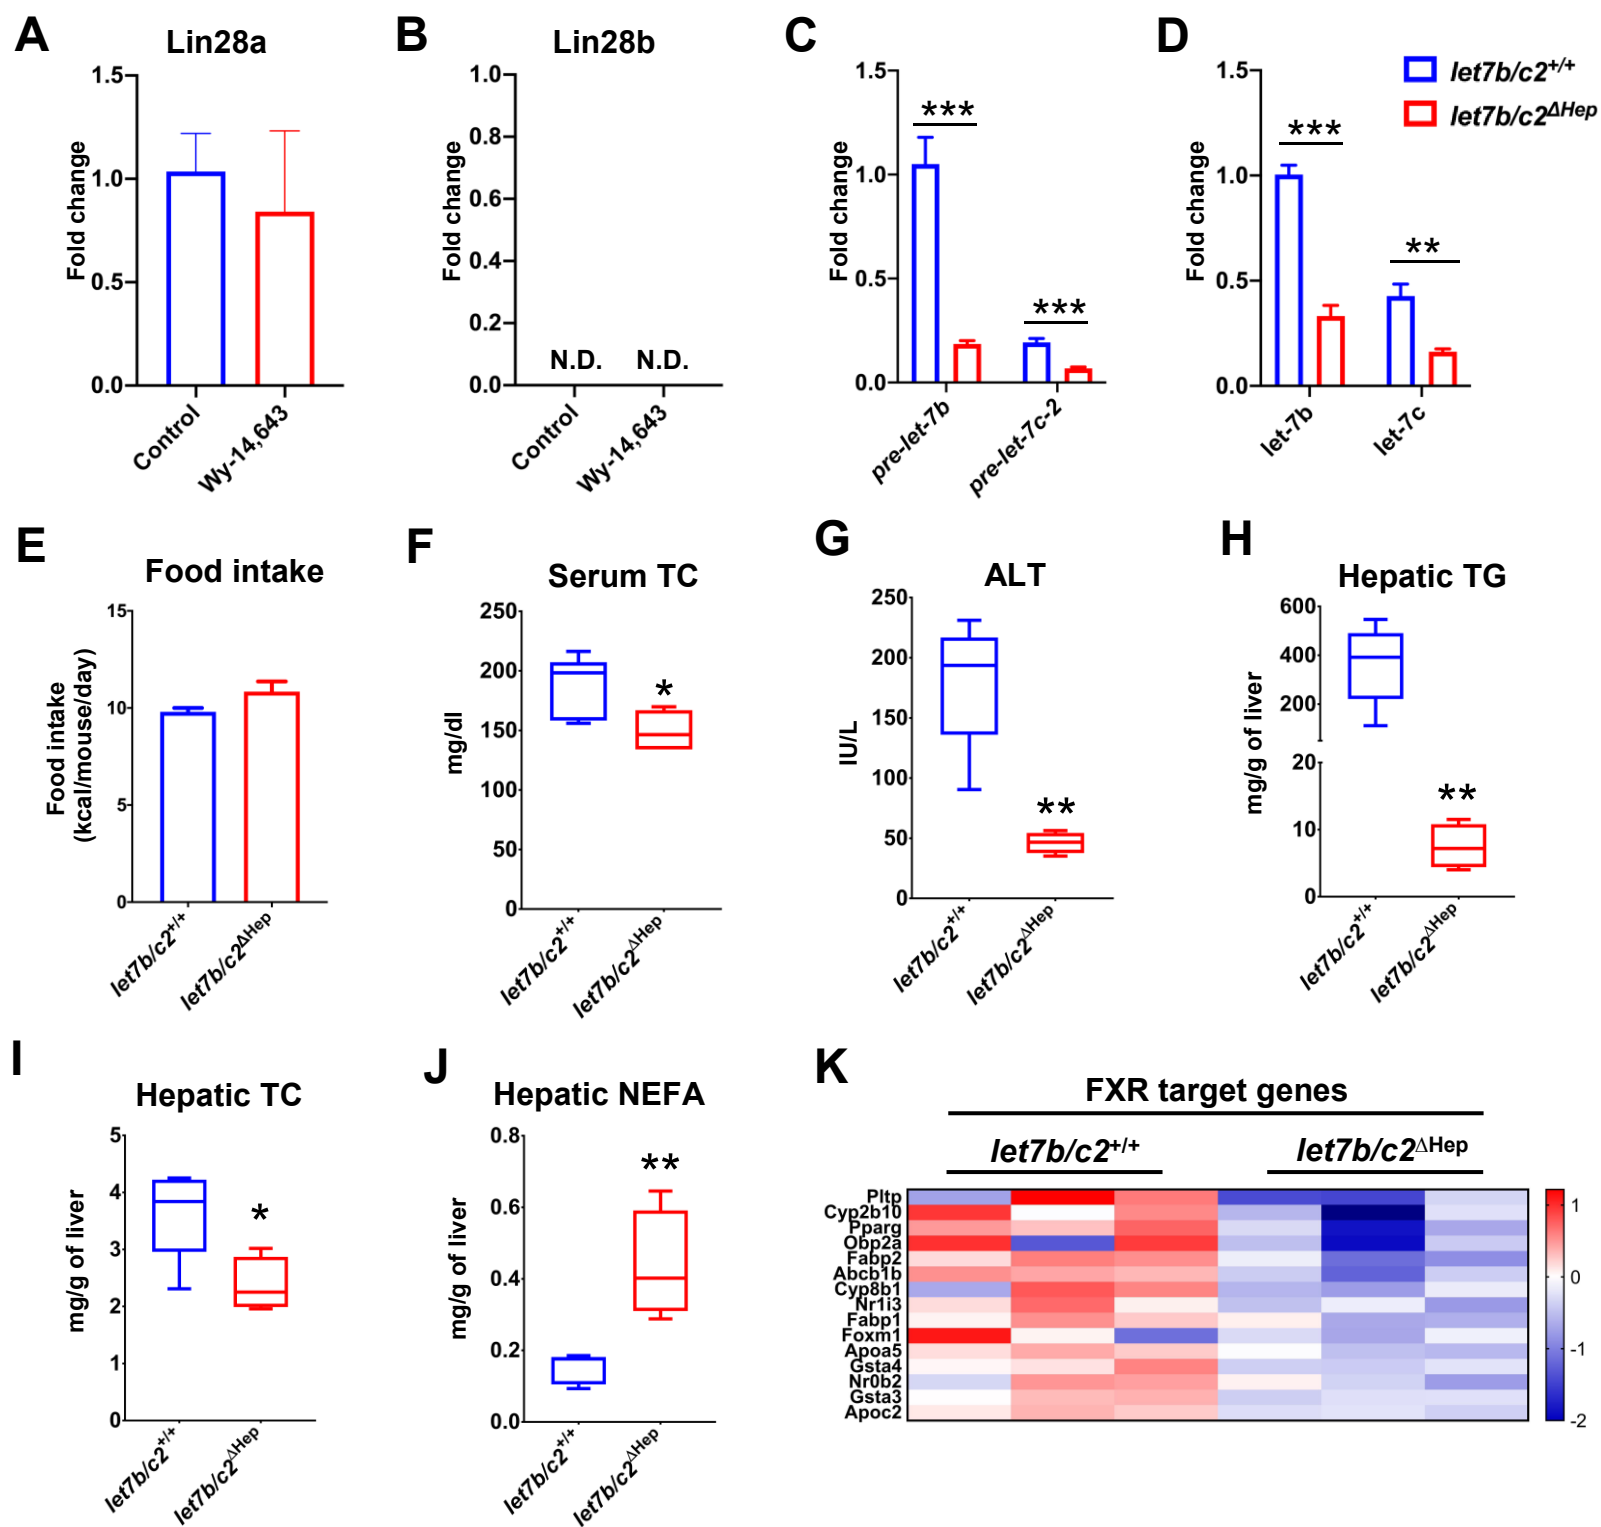

**Supplemental Figure 1. Lin28 expressions in liver and phenotypic analyses of *let7b/c2<sup>+/+</sup>* and *let7b/c2<sup>ΔHep</sup>* mice. Related to Figure 1 and 2.**

(A and B) Fold change of Lin28a (A) and Lin28b (B) mRNA abundance in Wy-14,643 treated liver. N.D.: Non-Detected.

(C and D) Fold change of *pre-let-7b* and *pre-let-7c-2* (C) and mature *let-7b* and *let-7c* (D) abundance in *let7b/c2<sup>+/+</sup>* and *let7b/c2<sup>ΔHep</sup>* livers.

(E) Average daily food intake (kcal/mouse/day) of *let7b/c2<sup>+/+</sup>* and *let7b/c2<sup>ΔHep</sup>* when HFD-feeding.

(F-J) Biochemical analyses for serum total cholesterol (TC) (F); alanine aminotransferase activity (ALT) (G); hepatic triglycerides (TG) (H); hepatic TC (I); and hepatic non-esterified fatty acid (NEFA) (J) in *let7b/c2<sup>+/+</sup>* and *let7b/c2<sup>ΔHep</sup>* mice after HFD-feeding.

(K) Heat map of FXR target genes identified by differential gene expression analysis of RNA-seq data from *let7b/c2<sup>+/+</sup>* and *let7b/c2<sup>ΔHep</sup>* livers after HFD-feeding. n = 5 mice/ group. Data are presented as mean ± SEM.

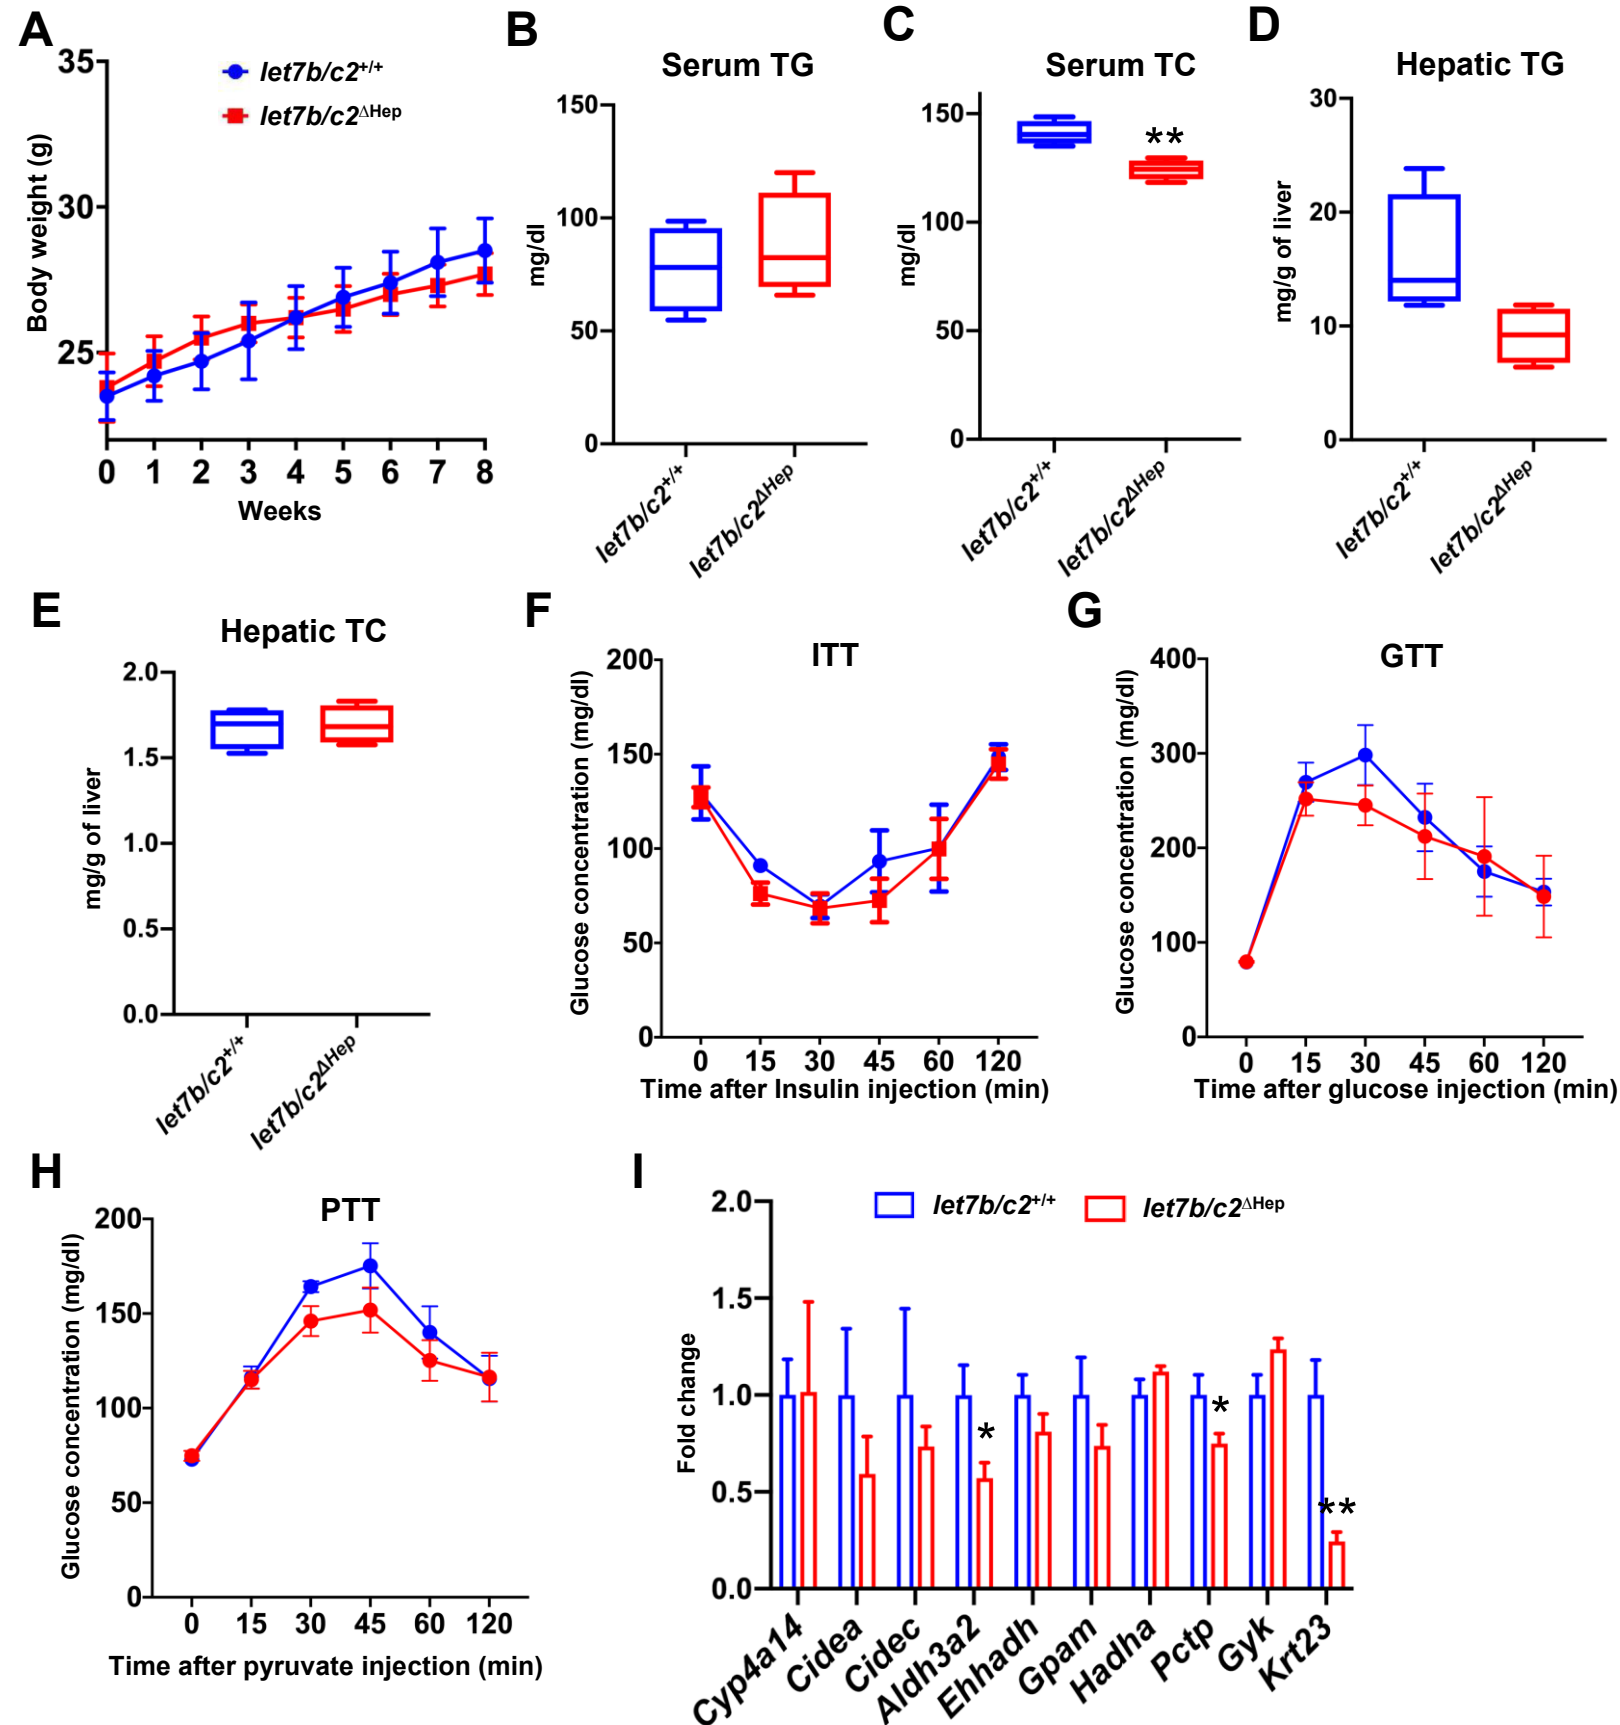

**Supplemental Figure 2. Biochemical assays for normal chow diet-fed *let7b/c2<sup>+/+</sup>* and *let7b/c2<sup>ΔHep</sup>* mice. Related to Figure 2.**

Body weight alterations of *let7b/c2<sup>+/+</sup>* and *let7b/c2<sup>ΔHep</sup>* mice during normal chow diet-feeding. Average daily food intake (kcal/mouse/day). N = 5 mice/ group. Data are presented as mean  $\pm$  SEM.

(B-E) Biochemical analyses for serum TG (B); serum TC (C); Hepatic TG (D); and Hepatic TC (E) in *let7b/c2<sup>+/+</sup>* and *let7b/c2<sup>ΔHep</sup>* mice after normal chow diet-feeding.

(F-H) ITT (F); GTT (G); and PTT (H) for normal chow diet-fed *let7b/c2<sup>+/+</sup>* and *let7b/c2<sup>ΔHep</sup>* mice.

(I) mRNA analysis by qRT-PCR of PPAR $\alpha$  target genes in *let7b/c2<sup>+/+</sup>* and *let7b/c2<sup>ΔHep</sup>* livers after 1-week HFD-feeding. n = 5 mice/ group. Data are presented as mean  $\pm$  SEM.

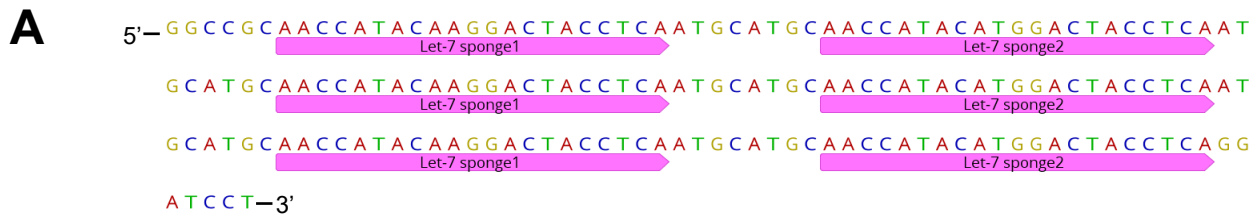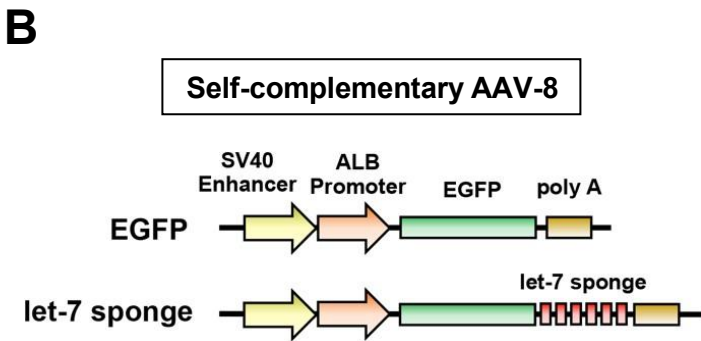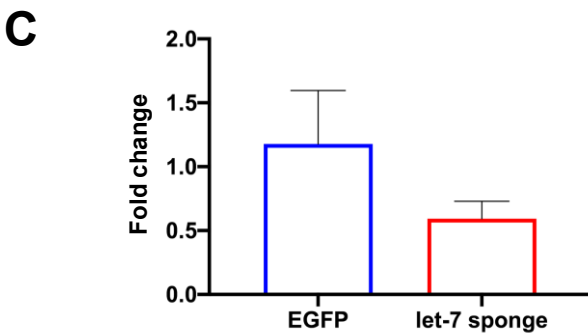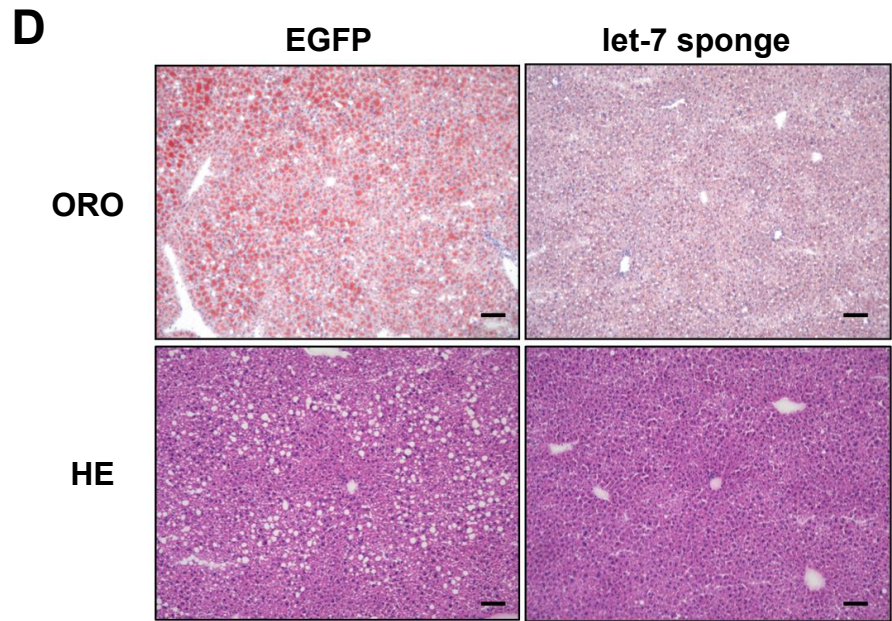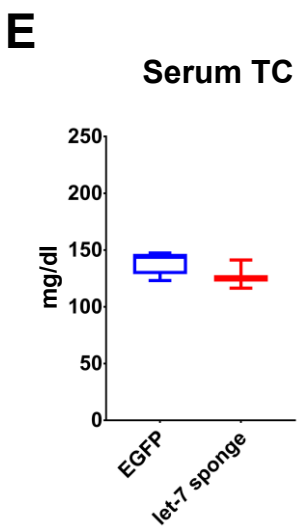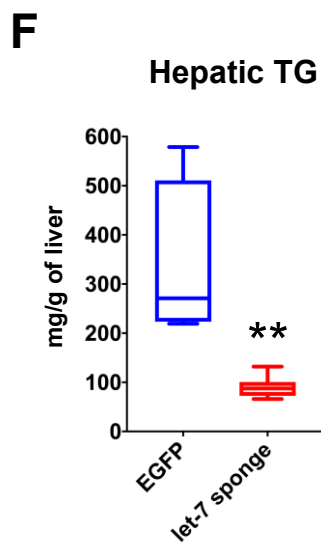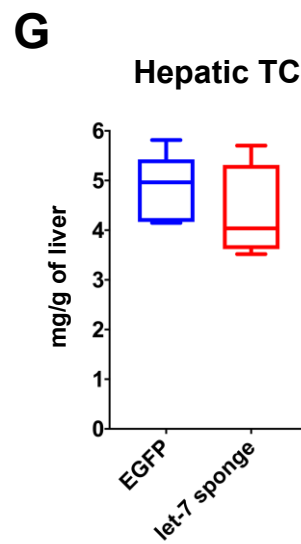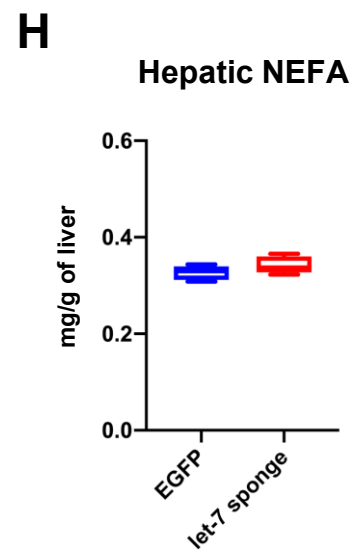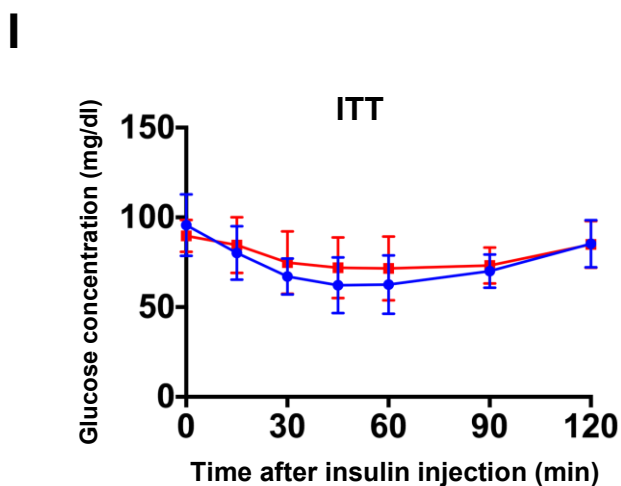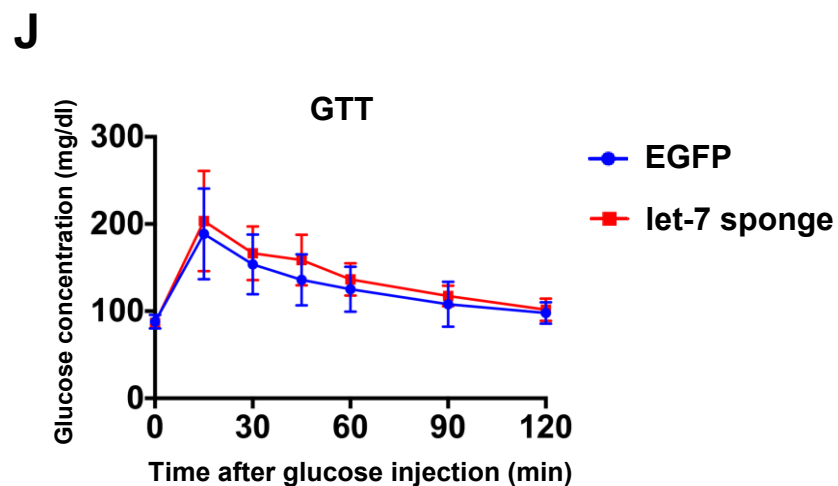

**Supplemental Figure 3. let-7 sponge AAV construction and phenotypes of let-7 sponge AAV-transduced mice related to Figure 2.**

(A) Sequence of let-7 sponge inserted in let-7 sponge AAV vector.

(B) Scheme of let-7 sponge expression AAV vector.

(C) qPCR analysis of GFP DNA in primary hepatocytes transduced by EGFP and let-7 sponge expressing AAV.

(D) Oil Red O staining of liver sections from wild-type mice infected with EGFP or let-7 sponge expressing AAV after being on HFD for eight weeks. Bars = 100 $\mu$ m

(E-H) Biochemical analyses for serum TC (D); hepatic TG (E); hepatic TC (F); and hepatic NEFA (G) concentration in EGFP and let-7 sponge AAV-infected mice after HFD-feeding.

(I and J) ITT (H); and GTT (I) for normal chow diet-fed EGFP and let-7 sponge AAV-infected mice.

Data are presented as mean  $\pm$  SEM. (n = 4-5 mice per group; \*p < 0.05)

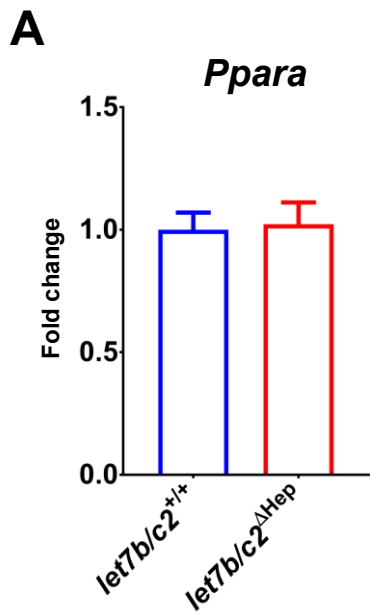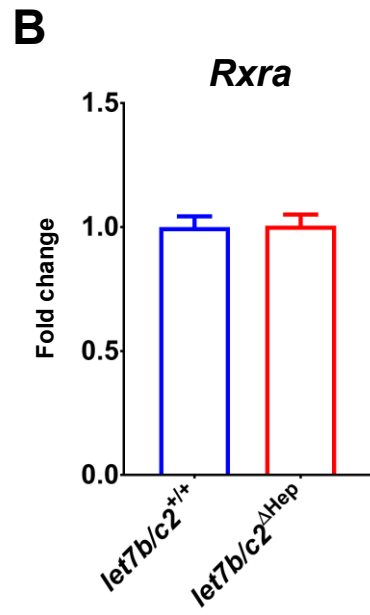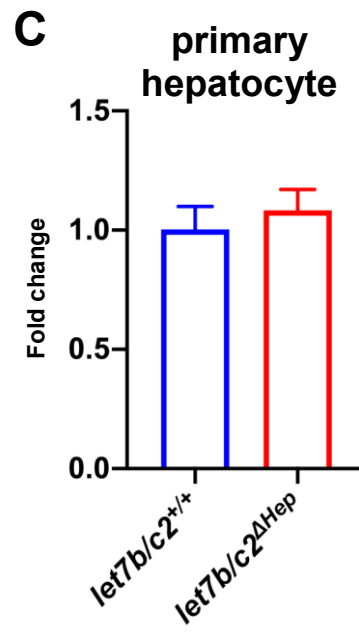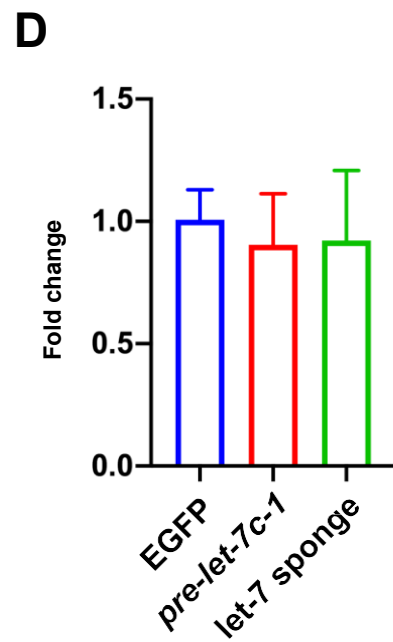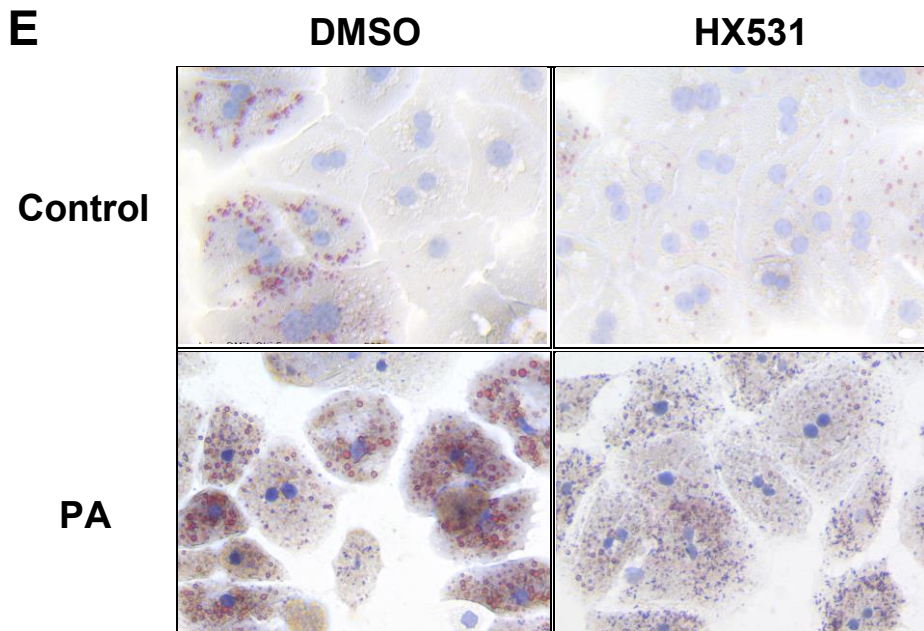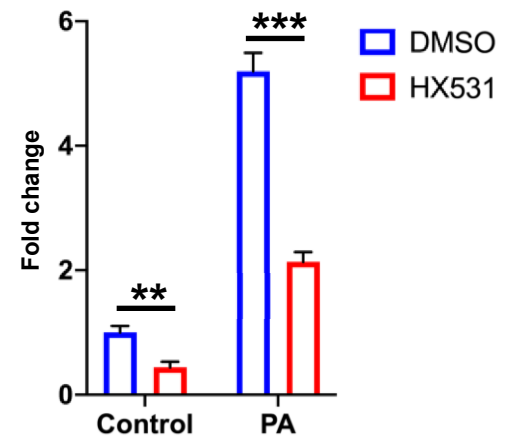

**I** *RXRα* - + +  
*RNF8* - - +

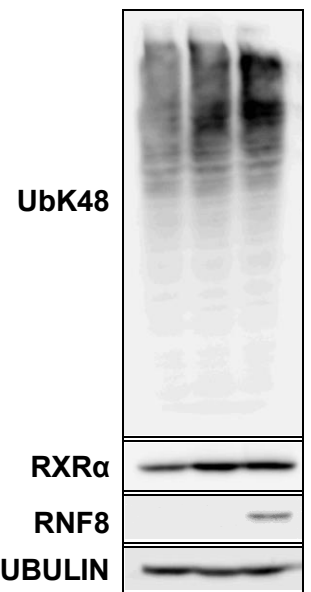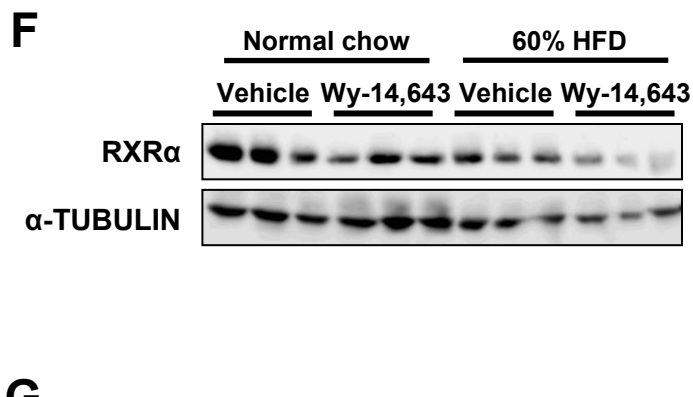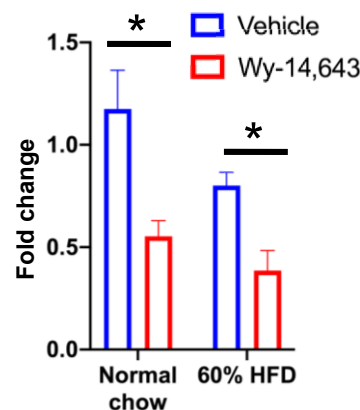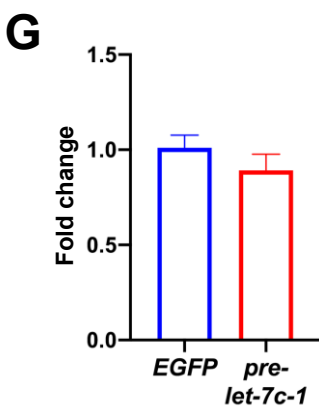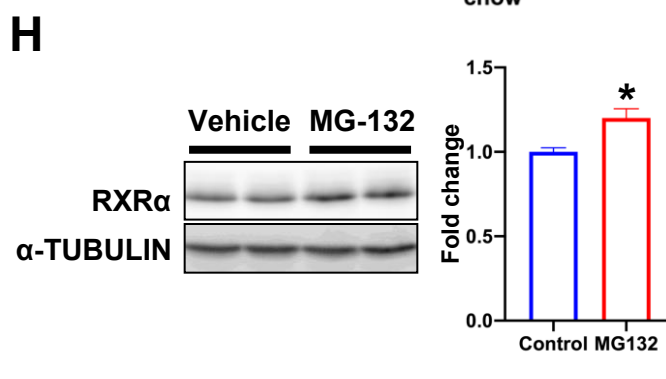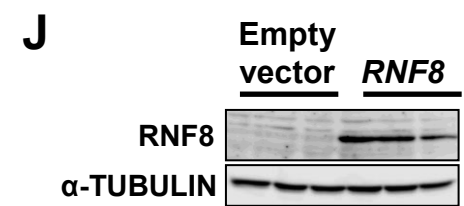

**Supplemental Figure 4. RXR $\alpha$  expressions, functions and protein ubiquitination by let-7 miRNA related to Figure 3 and 4.**

- (A-B) Fold change of PPAR $\alpha$  (A); and RXR $\alpha$  (B) mRNA in *let7b/c2<sup>+/+</sup>* and *let7b/c2 $\Delta$ <sup>Hep</sup>* livers fed HFD.
- (C) Fold change of RXR $\alpha$  mRNA in *let7b/c2<sup>+/+</sup>* and *let7b/c2 $\Delta$ <sup>Hep</sup>* primary hepatocytes.
- (D) Fold change of RXR $\alpha$  mRNA in EGFP, pre-let-7c-1 and let-7 sponge AAV-transduced liver after HFD-feeding.
- (E) Oil red O staining and the morphometric analysis for lipid accumulation in mouse primary hepatocytes treated with Palmitic acid (800  $\mu$ M) and/or HX-531 (5  $\mu$ M).
- (F) Western blot analysis and the densitometric quantification of RXR $\alpha$  in 60% HFD and/or Wy-14,643-treated mouse livers.
- (G) Fold change of *Rnf8* mRNA in EGFP and pre-let-7c-1 AAV-transduced liver.
- (H) Western blot analysis and the densitometric quantification of RXR $\alpha$  in *Rxra* transfected Hepa-1 cells treated with the proteasome inhibitor MG-132.
- (I) Western blot analysis of K48 polyubiquitin chain in *Rxra* and *Rnf8* transfected Hepa-1 cells.
- (J) Western blot analysis of RNF8 protein in *Rnf8* transfected Hepa-1 cells.
- Data are presented as mean  $\pm$  SEM. (n = 4-5 blots or fields per group; \*p < 0.05, \*\*p < 0.01, \*\*\*p < 0.001)

**Supplemental Table 1. *let-7* microRNA family in mice related to Figure 1**

| Mature <i>let-7</i> microRNA | Precursor           | Primary transcript | Clustered <i>let-7</i> precursor                     | Chromosome | miRBase ID |
|------------------------------|---------------------|--------------------|------------------------------------------------------|------------|------------|
| <i>let-7a</i>                | <i>pre-let-7a-1</i> | let-7adf cluster   | <i>pre-let-7d, pre-let-7f-1</i>                      | Chr.13     | MI0000556  |
|                              | <i>pre-let-7a-2</i> | 3110039I08Rik      |                                                      | Chr.9      | MI0000557  |
| <i>let-7b</i>                | <i>pre-let-7b</i>   | Lincppara          | <i>pre-let-7c-1</i>                                  | Chr.15     | MI0000558  |
| <i>let-7c</i>                | <i>pre-let-7c-1</i> | 2810055G20Rik      | <i>pre-let-7b</i>                                    | Chr.16     | MI0000559  |
|                              | <i>pre-let-7c-2</i> | Lincppara          |                                                      | Chr.15     | MI0000560  |
| <i>let-7d</i>                | <i>pre-let-7d</i>   | let-7adf cluster   | <i>pre-let-7a-1, pre-let-7f-1</i>                    | Chr.13     | MI0000405  |
| <i>let-7e</i>                | <i>pre-let-7e</i>   | Spaca6             |                                                      | Chr.17     | MI0000561  |
| <i>let-7f</i>                | <i>pre-let-7f-1</i> | let-7adf cluster   | <i>pre-let-7a-1, pre-let-7d</i><br><i>pre-miR-98</i> | Chr.13     | MI0000562  |
|                              | <i>pre-let-7f-2</i> | Huwe1              |                                                      | Chr.X      | MI0000563  |
| <i>let-7g</i>                | <i>pre-let-7g</i>   | Wdr82              |                                                      | Chr.9      | MI0000137  |
| <i>let-7i</i>                | <i>pre-let-7i</i>   | mmu-let-7i         |                                                      | Chr.10     | MI0000138  |
| <i>miR-98</i>                | <i>pre-miR-98</i>   | Huwe1              | <i>pre-let-7f-2</i>                                  | Chr.X      | MI0000586  |

Summary of mature *let-7* miRNA, the precursors and the primary transcripts. Mature *let-7a*, *c* and *f* are processed from two precursors. *Pre-let-7a-1*, *pre-let-7d* and *pre-let-7f-1* are processed from an identical primary transcript. *Pre-let-7b* and *pre-let-7c-1* are also processed from an identical primary transcript



**Supplemental Table 2. Downregulated pathways in *let7b/c2*<sup>ΔHep</sup> mouse liver compared with *let7b/c2*<sup>+/+</sup> related to Figure 3**

| Upstream Regulator                          | Expr Log Ratio | Molecule Type                     | Predicted Activation State | Activation z-score |
|---------------------------------------------|----------------|-----------------------------------|----------------------------|--------------------|
| PPARA                                       | 0.032          | ligand-dependent nuclear receptor | Inhibited                  | -6.751             |
| INSIG1                                      | 0.13           | other                             | Inhibited                  | -3.564             |
| Alpha catenin                               |                | group                             | Inhibited                  | -3.389             |
| HOXA3                                       |                | transcription regulator           | Inhibited                  | -3.357             |
| CFTR                                        |                | ion channel                       | Inhibited                  | -3.194             |
| PPARG                                       | -1.333         | ligand-dependent nuclear receptor | Inhibited                  | -3.171             |
| NR1H4                                       | 0.035          | ligand-dependent nuclear receptor | Inhibited                  | -3.134             |
| PPARD                                       | 0.348          | ligand-dependent nuclear receptor | Inhibited                  | -3.119             |
| KLF15                                       | 0.058          | transcription regulator           | Inhibited                  | -2.721             |
| LPL                                         | 1.748          | enzyme                            | Inhibited                  | -2.619             |
| TP73                                        |                | transcription regulator           | Inhibited                  | -2.601             |
| PNPLA2                                      | 0.618          | enzyme                            | Inhibited                  | -2.498             |
| LCAT                                        | -0.135         | enzyme                            | Inhibited                  | -2.449             |
| ABCG1                                       | 0.414          | transporter                       | Inhibited                  | -2.433             |
| INSIG2                                      | -0.922         | other                             | Inhibited                  | -2.415             |
| let-7a-5p (and other miRNAs w/seed GAGGUAG) |                | mature microRNA                   | Inhibited                  | -2.414             |
| ZFP36                                       | -0.182         | transcription regulator           | Inhibited                  | -2.412             |
| let-7                                       |                | microRNA                          | Inhibited                  | -2.401             |
| ZBTB20                                      | 0.568          | transcription regulator           | Inhibited                  | -2.4               |

Pathway analysis for RNA-seq data from 60% HFD-fed *let7b/c2*<sup>+/+</sup> and *let7b/c2*<sup>ΔHep</sup> mouse livers. PPAR and FXR pathways (blue labeled) were significantly repressed by *let7b/c2* deletion in liver.

**Supplemental Table 3. Primers and Oligos used in this paper related to STAR Methods**

| Primers for mouse Quantitative RT-PCR                       |                                                                                                                                                                                                                                                                                                                                                           |                                 |
|-------------------------------------------------------------|-----------------------------------------------------------------------------------------------------------------------------------------------------------------------------------------------------------------------------------------------------------------------------------------------------------------------------------------------------------|---------------------------------|
|                                                             | Forward (5' to 3')                                                                                                                                                                                                                                                                                                                                        | Reverse (5' to 3')              |
| <i>pre-Let-7a-1</i>                                         | TTAGGGTCACACCCACCAC                                                                                                                                                                                                                                                                                                                                       | ATCACCTTAGGAAAGACAGTAGATTG      |
| <i>pre-Let-7a-2</i>                                         | TAGAGTTACATCAAGGGAGATAACTG                                                                                                                                                                                                                                                                                                                                | GTGCAAGTCCCAAGGAAAG             |
| <i>pre-Let-7b</i>                                           | TCAGGGCAGTGATGTTGCC                                                                                                                                                                                                                                                                                                                                       | TCAGGGAAGGCAGTAGGTTG            |
| <i>pre-Let-7c-1</i>                                         | GAGTTACACCCTGGGAGTTAACTG                                                                                                                                                                                                                                                                                                                                  | AGTGTGCTCCAAGGAAAGCTAG          |
| <i>pre-Let-7c-2</i>                                         | TTTTGGGCTCTGCCCCGC                                                                                                                                                                                                                                                                                                                                        | GCGGCCACTTCAGGAAAGACAG          |
| <i>pre-Let-7d</i>                                           | TTAGGGCAGAGATTTTGCCC                                                                                                                                                                                                                                                                                                                                      | GCCCTAAGAAAGGCAGCAGG            |
| <i>pre-Let-7e</i>                                           | TGAGGAAGACACCCGAGGAG                                                                                                                                                                                                                                                                                                                                      | GCAGCCTGGGGAAAGCTAG             |
| <i>pre-Let-7f-1</i>                                         | GTGGGGTAGTGATTTTACCCTG                                                                                                                                                                                                                                                                                                                                    | CTCAGGGAAGGCAATAGATTGTATAG      |
| <i>pre-Let-7f-2</i>                                         | TTAGGGTCATACCCCATCTTGG                                                                                                                                                                                                                                                                                                                                    | CGTGGGAAAGACAGTAGACTGTATAG      |
| <i>pre-Let-7g</i>                                           | TGAGGGTCTATGATACCACCCG                                                                                                                                                                                                                                                                                                                                    | GCAAGGCAGTGGCCTGTAC             |
| <i>pre-Let-7i</i>                                           | GGTCGGGTTGTGACATTGC                                                                                                                                                                                                                                                                                                                                       | CTAGCAAGGCAGTAGCTTGCG           |
| <i>pre-miR98</i>                                            | GTGGGGTAGGGATTTTAGGCC                                                                                                                                                                                                                                                                                                                                     | ATGCCACACACCAAGGAAAGTAG         |
| <i>Cyp4a14</i>                                              | CCTGACTTTCTTTCGCCTGC                                                                                                                                                                                                                                                                                                                                      | TGATCACTCCATCTGTGTGCT           |
| <i>Ehhadh</i>                                               | CCGGTCAATGCCATCAGT                                                                                                                                                                                                                                                                                                                                        | CCGGTCAATGCCATCAGT              |
| <i>Hadha</i>                                                | AGGATCCTACGCTCCAGAGG                                                                                                                                                                                                                                                                                                                                      | AAGCAGGATCCACTGATGGC            |
| <i>Krt23</i>                                                | CTGATTCAGCTCCGCCAAGA                                                                                                                                                                                                                                                                                                                                      | TCCATCGTCCCTTCAGTGTC            |
| <i>Aldh3a2</i>                                              | GGTCAAACCTGCATTGCTCC                                                                                                                                                                                                                                                                                                                                      | TCCCATAAAAAGTCCTCACCG           |
| <i>Cidea</i>                                                | GACAGAAATGGACACCGGGTA                                                                                                                                                                                                                                                                                                                                     | TGACATTGAGACAGCCGAGG            |
| <i>Cidec</i>                                                | TGGCACAATCGTGGAGACAG                                                                                                                                                                                                                                                                                                                                      | CTCTCTTCTTGCCTGTTCTG            |
| <i>Gpam</i>                                                 | TGTGTACCCGAAGGTCTCCA                                                                                                                                                                                                                                                                                                                                      | TGTTTACATCGGCCAAGGCT            |
| <i>Pctp</i>                                                 | GGCTCTCCTCGCAGATGTTT                                                                                                                                                                                                                                                                                                                                      | TGAGCCAGGACGGAATTTGG            |
| <i>Gyk</i>                                                  | TGGCCTAATGAAAGCTGGGG                                                                                                                                                                                                                                                                                                                                      | TGCACTGGGCTCCCAATAAG            |
| <i>Gapdh</i>                                                | AGGTCGGTGTGAACGGATTTG                                                                                                                                                                                                                                                                                                                                     | TGTAGACCATGTAGTTGAGGTCA         |
| <i>Ppara</i>                                                | CACGCATGTGAAGGCTGTAA                                                                                                                                                                                                                                                                                                                                      | CACGCATGTGAAGGCTGTAA            |
| <i>Rxra</i>                                                 | CTCAATGGCGTCCTCAAGGT                                                                                                                                                                                                                                                                                                                                      | ACCCCATAGTGTGGCCTGAG            |
| <i>Rnf8</i>                                                 | GACTTTCCAGGAGGAGGCAC                                                                                                                                                                                                                                                                                                                                      | CCAGGGAGTTGGTTCTGGAC            |
| <i>Egfp</i>                                                 | AAGCTGACCCTGAAGTTCATCTGC                                                                                                                                                                                                                                                                                                                                  | CTTGTAGTTGCCGTCGTCCTTGAA        |
| Oligos for Let-7 sponge AAV construction (5' to 3')         |                                                                                                                                                                                                                                                                                                                                                           |                                 |
| Let-7 sponge                                                | GGCCGCAACCATAACAAGGACTACCTCAATGCATGCAACCATAACATGGACTACCTCAATGCATGCAACCATAACAAGG<br>ACTACCTCAATGCATGCAACCATAACATGGACTACCTCAATGCATGCAACCATAACAAGGACTACCTCAATGCATGCAA<br>CCATACATGGACTACCTCAGGATCCT                                                                                                                                                          |                                 |
| Let-7 sponge complement                                     | CTAGAGGATCCTGAGGTAGTCCATGTATGGTTGCATGCATTGAGGTAGTCCCTTGTATGGTTGCATGCATTGAGGTAG<br>TCCATGTATGGTTGCATGCATTGAGGTAGTCCCTTGTATGGTTGCATGCATTGAGGTAGTCCATGTATGGTTGCATGC<br>ATTGAGGTAGTCCCTTGTATGGTTGC                                                                                                                                                            |                                 |
| Primers for <i>pre-Let-7c-1</i> AAV construction (5' to 3') |                                                                                                                                                                                                                                                                                                                                                           |                                 |
| Let-7c-1 NotI EcoRV                                         | AAAGCGCCGCTAATGGAAGTGTGGTCAAGG                                                                                                                                                                                                                                                                                                                            | AAAGATATCGCGTTGTGTCATTGCTTACAAG |
| Oligos for <i>Rnf8</i> 3'UTR luciferase reporter vectors    |                                                                                                                                                                                                                                                                                                                                                           |                                 |
| <i>Rnf8</i> 3'UTR Wild-type                                 | AAAGCTAGCGACTGAGTTAGGAAGTCTGTGCCACTGGCCTCCGTCATGCAGGCCCTGCTGCTACCACCCCCCAA<br>CGTGTGCTGGGACCCTGCTCGGACTGCCTGACTGTGCATTAATGAGTTGAGTTCTGTGTTTCTTAATTTGTTGATT<br>GTTTTTGATACCTCATGCACCCTCTTGACATCATTGTGGACAGCTGGGTGTGAGTCCTGTGGCTGTGTGGAAGGT<br>GGCCTGCATTTTGTAGAGCCTGGTTTACCTTTTATGAAAACATGATGTCATTTCTTGGGAATAAAATGTATAAACTC<br>TCAGTTGCTCAGCTGGCTCGAGAAA   |                                 |
| <i>Rnf8</i> 3'UTR Mutant                                    | AAAGCTAGCGACTGAGTTAGGAAGTCTGTGCCACTGGCCTCCGTCATGCAGGCCCTGCTGCTACCACCCCCCAA<br>CGTGTGCTGGGACCCTGCTCGGACTGCCTGACTGTGCATTAATGAGTTGAGTTCTGTGTTTCTTAATTTGTTGATT<br>GTTTTTGAGCGGCCGCTGCACCCTCTTGACATCATTGTGGACAGCTGGGTGTGAGTCCTGTGGCTGTGTGGAAG<br>GTGGCCTGCATTTTGTAGAGCCTGGTTTACCTTTTATGAAAACATGATGTCATTTCTTGGGAATAAAATGTATAAAAC<br>TCTCAGTTGCTCAGCTGGCTCGAGAAA |                                 |

Primers and oligos used for qRT-PCR. AAV constructs and *Rnf8* 3'UTR reporter vectors.
